# Supplementary material for: C@KCu7S4 microstructure for solid-state supercapacitors
Source: Royal Society of Chemistry journal article supplement (doi:10.1039/c4ra04893h), 2014-01-01
Supplement: c4ra04893h1.pdf [file c4ra04893h1.pdf]

## **Supporting Information for**

### **C@KCu<sub>7</sub>S<sub>4</sub> Microstructure for Solid-state Supercapitors**

Shuge Dai, Yi Xi,\* Chenguo Hu, Baoshan Hu,\* Xule Yue, Lu Cheng and Guo Wang

Content:

The contents of Supporting Information include the following:

- (1) Electrochemical characterization of C@KCu<sub>7</sub>S<sub>4</sub> hybrid supercapacitors.
- (2) The screen of three supercapacitor units to light a light-emitting diode (LED).

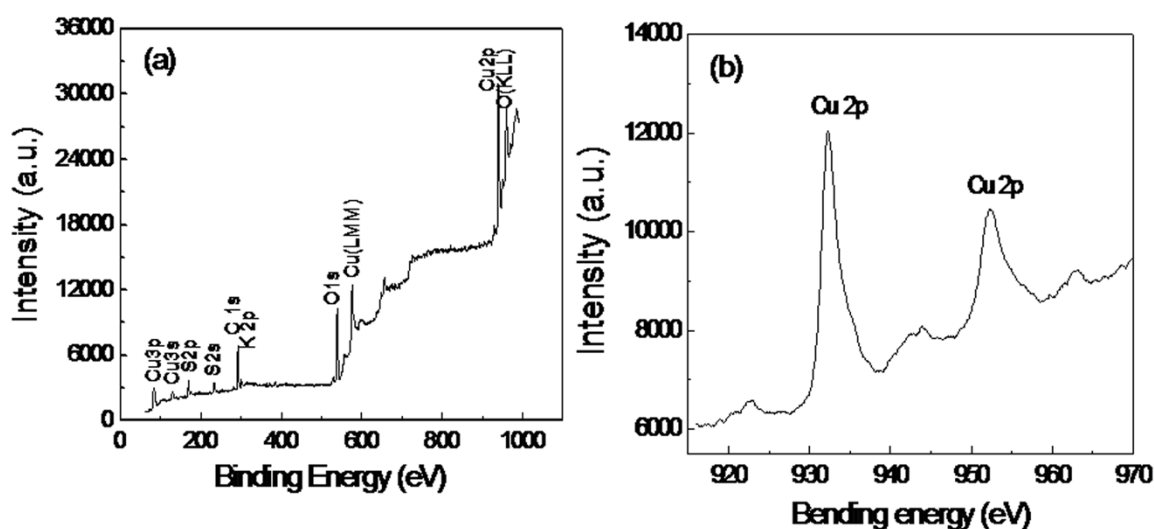

Fig. S1 (a) XPS spectrum of the KCu<sub>7</sub>S<sub>4</sub> microwires level. (b) XPS spectrum of Cu 2p for KCu<sub>7</sub>S<sub>4</sub> microwires level.

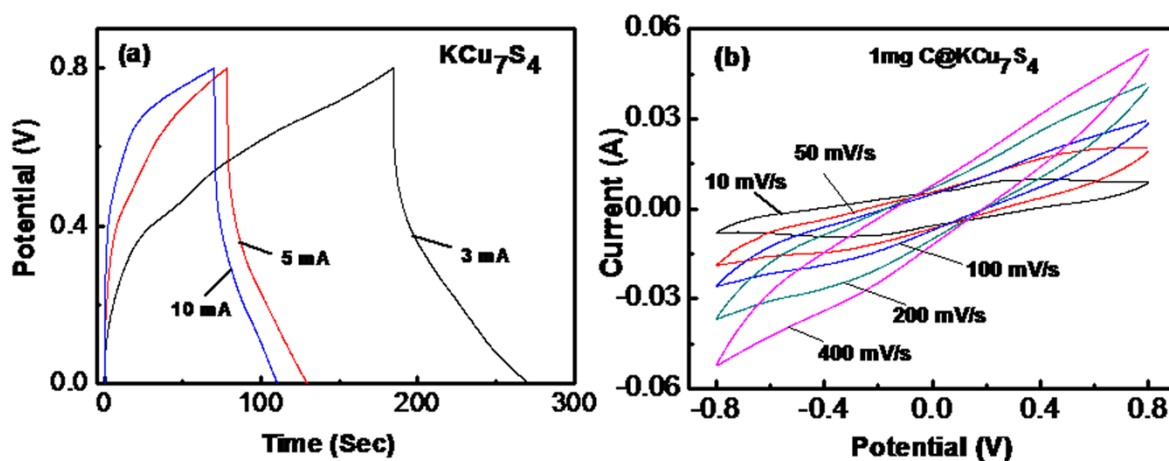

Fig. S2 (a) Galvanostatic charging-discharging curves for KCu<sub>7</sub>S<sub>4</sub> microwires supercapacitor at the different current (the effective area of each electrode is about 1.2 cm<sup>2</sup>). (b) CV curves of C@KCu<sub>7</sub>S<sub>4</sub> hybrid supercapacitors at various scan rates.

Fig. S3 The screen of three supercapacitor units (2 mg C@KCu<sub>7</sub>S<sub>4</sub> hybrid supercapacitors) in series to light one light-emitting diode (LED)
